# Supplementary material
Source: PubMed Central journal article supplement (PMC2612504)
Supplement: supp_29_2_570__1.pdf [file supp_29_2_570__1.pdf]

## Supplementary information S1

### Reverse Primers used for 5' RLM-RACE analysis

| <b>name</b>                                        | <b>Sequence</b>                              | <b>RefSeq</b> | <b>position</b>                            |
|----------------------------------------------------|----------------------------------------------|---------------|--------------------------------------------|
| <b>RacGAP_Rev_Outer</b><br><b>RacGAP_Rev_Inner</b> | GAGCACTTCGCTCAGTCTCT<br>GATTCCGCACATTCAGCATC | AK000733.1    | 279-259, (-) strand<br>108-89, (-) strand  |
| <b>MKLP1_Rev_Outer</b><br><b>MKLP1_Rev_Inner</b>   | CCTGGAGAACCAGTCATTGT<br>GTCTTAGCTCTCGCTGACTT | NM_138555.1   | 497-476, (-) strand<br>142-121, (-) strand |
| <b>Ect2_Rev_Outer</b><br><b>Ect2_Rev_Inner</b>     | TGGAAGAGTCTGCCAAGCTA<br>CGCGGTGGCTCACACTTGTA | AY376439.1    | 505-486, (-) strand<br>370-351, (-) strand |

Sequence alignments of 5'RACE products with genomic and mRNA genebank references (following pages)

Sequence alignments of Ect2 5'RACE products with genomic and mRNA genebank references

```

                                +1
genomic(1) TGGGAAAGAGGTTGACATCACGC  GCCAATCGGCATGGCTCTTAGAGAGAGCAGCTTAGTTTTTGAATCGGTTGTGGCGGC.....
BC070038.1  ---GCCTATCGGCATGGCTCTTAGAGAGAGCAGCTTAGTTTTTGAATCGGTTGTGGCGGC.....
AY376439.1  -----TTTTTGAATCGGTTGTGGCGGC.....

ect2-12     -----GAGAGAGCAGCTTAGTTTTTGAATCGGTTGTGGCGGC.....
ect2-15     -----AGAGAGAGCAGCTTAGTTTTTGAATCGGTTGTGGCGGC.....
ect2-14     -----GAGAGAGCAGCTTAGTTTTTGAATCGGTTGTGGCGGC.....
ect2-13     -----AGAGAGAGCAGCTTAGTTTTTGAATCGGTTGTGGCGGC.....
ect2-11     -----ATCGGCATGGCTCTTAGAGAGAGCAGCTTAGTTTTTGAATCGGTTGTGGCGGC.....
ect2-PCR    -----ATCGGCCTGGCTCTTAGAGAGAGCAGCTTAGTTTTTGAATCGGTTGTGGCGGC.....
    
```

(1) Homo Sapiens chromosome 3, clone RP11-816B4, nt 41101-41181, accession #AC108667

Sequence alignments of MgcRacGAP 5'RACE products with genomic and mRNA genebank references

+1

```

genomic (1) CCTGACGCGTACGTCACACCGTAGAGGGACGGCGCGGGAGGAATAAAATTTCTCTGTGATTGGTTGGTGAAGGTTTTCAAACCGGAGCTGTGGGCGCGGCCTGCTCTGCCGTTGGGTGAGGCGCGGAGCGAAGT
AK000733.1                                                                                                                                           GCGGAGCGAAGT

RG-2          ACGTCACACCGTAGAGGGACGGCGCGGGAGGAATAAAATTTCTCTGTGATTGGTTGGTGAAGGTTTTCAAACCGGAGCTGTGGGCGCGGCCTGCTCTGCCGTTGGGTGAGGCGCGGAGCGAAGT
RG-16                                                                                                                                           TTTTCAAACCGGAGCTGTGGGCGCGGCCTGCTCTGCCGTTGGGTGAGGCGCGGAGCGAAGT
RG-4                                                                                                                                           TGAGGCGCGGAGCGAAGT
RG-1                                                                                                                                           TTTTCAAACCGGAGCTGTGGGCGCGGCCTGCTCTGCCGTTGGGTGAGGCGCGGAGCGAAGT

genomic (1)  GAAGGGTGGCCAGGTGGGGCCAGGCTGACTGAAGTGAGTAGTGGGGTGCCAGACCAGGTGCGTCTGCCGCTGGATTGTGATAGGAAGCAGAGTGTTCCGTGTGTGAGGCC
AK000733.1  GAAGGGTGGCCAGGTGGGGCCAGGCTGACT.....
BC032754.1  GAAGTGAGTAGTGGGGTGCCAGACCAGGTGCGTCTGCCGCTGGATTGTGATAGGAAGCAGAGTGTTCCGTGTG

RG-2          GAAGGGTGGCCAGGTGGGGCCAGGCTGACTGAA.....
RG-16         GAAGGGTGGCCAGGTGGGGCCAGGCTGACTGAAGTGAGTAGTGGGGTGCCAGACCAGGTGCGTCTGCCGCTGGATTGTGATAGGAAGCAGAGTGTTCCGTGTG
RG-4          GAAGGGTGGCCAGGTGGGGCCAGGCTGACTGAAGTGAGTAGTGGGGTGCCAGACCAGGTGCGTCTGCCGCTGGATTGTGATAGGAAGCAGAGTGTTCCGTGTG
RG-1          GAAGGGTGGCCAGGTGGGGCCAGGCTGACTGAA.....
    
```

(1) Homo Sapiens chromosome 12, clone RP11-469H8, nt 77945-77720, accession #AC025154.31  
 Note : RGl.seq represented 5 times

Sequence alignments of MKLP1 5'RACE products with genomic and mRNA genebank references

```

                                +1
genomic(1)  CTGCGGACGGGCGCTGATTGGCCCGTTTGAATGCGCCAGGCGGGAGCTCACCTGGGCTCTTAGCGTCGCCGCCGGCTTCGCAGAGCACCG.....
BC051826.1  -----GCCAGGCGGGAGCTCACCTGGGCTCTTAGCGTCGCCGCCGGCTTCGCAGAGCACCG.....
NM_138555.1  -----GCAGAGCACCG.....

mklp1-1     ATTGGCCCGTTTGAATGCGCCAGGCGGGAGCTCACCTGGGCTCTTAGCGTCGCCGCCGGCTTCGCAGAGCACCG.....
mklp1-27    - -----AGCGTCGCCGCCGGCTTCGCAGAGCACCG.....
mklp1-30    -----AGCGTCGCCGCCGGCTTCGCAGAGCACCG.....
mklp1-6     -----GTCGCCGCCGGCTTCGCAGAGCACCG.....
mklp1-2     -----TTAGCGTCGCCGCCGGCTTCGCAGAGCACCG.....
mklp1-8     -----TTAGCGTCGCCGCCGGCTTCGCAGAGCACCG.....
mklp1-29    -----GGAGCTCACCTGGGCTCTTAGCGTCGCCGCCGGCTTCGCAGAGCACCG.....
mklp1-46    -----ACCTGGGCTCTTAGCGTCGCCGCCGGCTTCGCAGAGCACCG.....
mklp1-36    -----CTGGGCTCTTAGCGTCGCCGCCGGCTTCGCAGAGCACCG.....

```

(1) Homo Sapiens chromosome 15, clone RP11-253MP7, nt 85607-85502, accession #AC027237.8

Note : Three Human ESTs (Accession # DR000298.1, BG721996.1 and DB147121.1) are similar to sequence mklp1\_1
